# Supplementary figures and images for: Development and External Validation of a Prediction Model for Colorectal Cancer Among Patients Awaiting Surveillance Colonoscopy Following Polypectomy
Source: PubMed Central journal article supplement — Gastro Hep Adv. 2024 Mar 15;3(5):671–83. doi: 10.1016/j.gastha.2024.03.008 (PMC11330934; doi:10.1016/j.gastha.2024.03.008), 2024-03-15

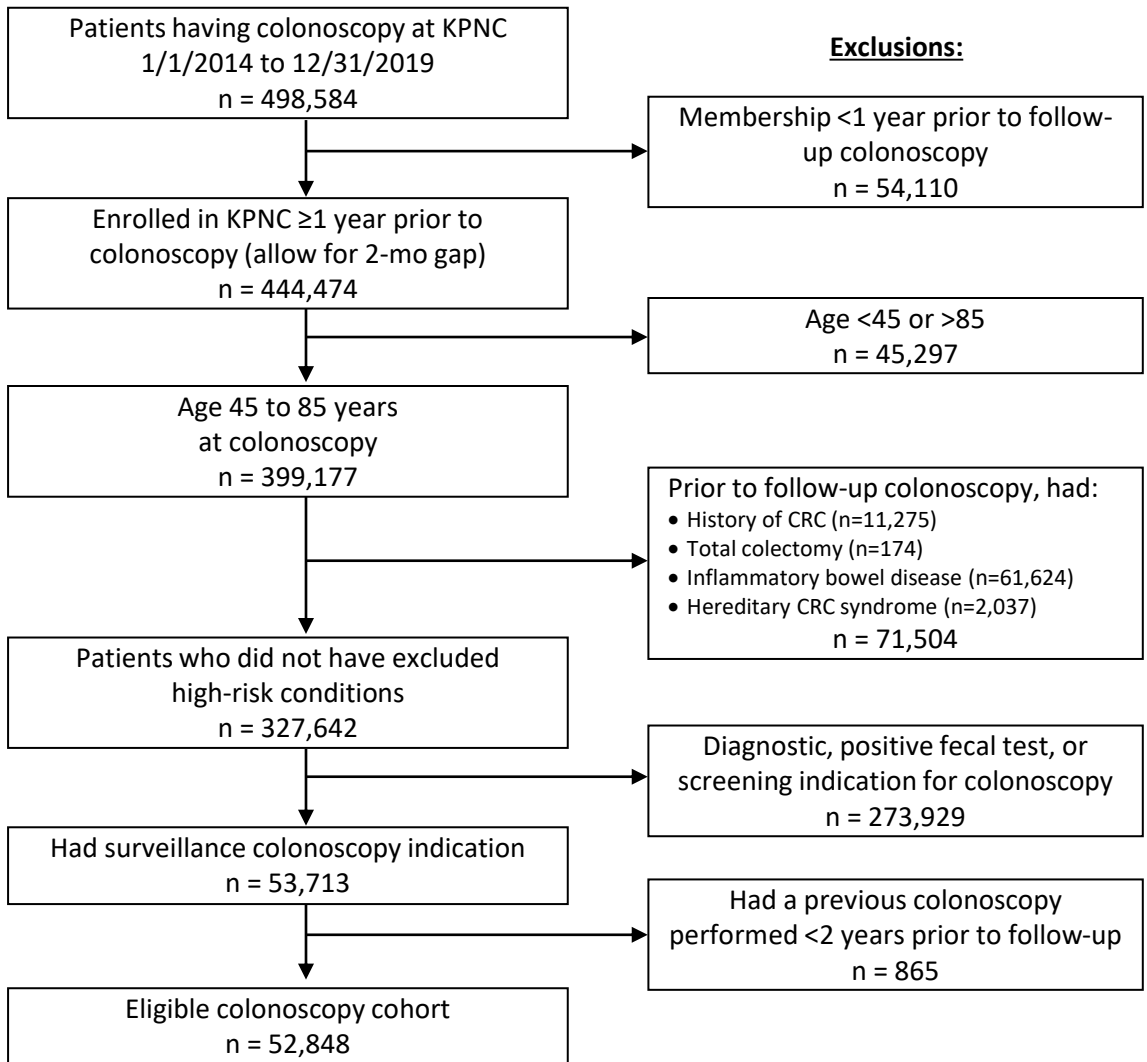

Supplement: mmc1.pdf [file mmc1.pdf]

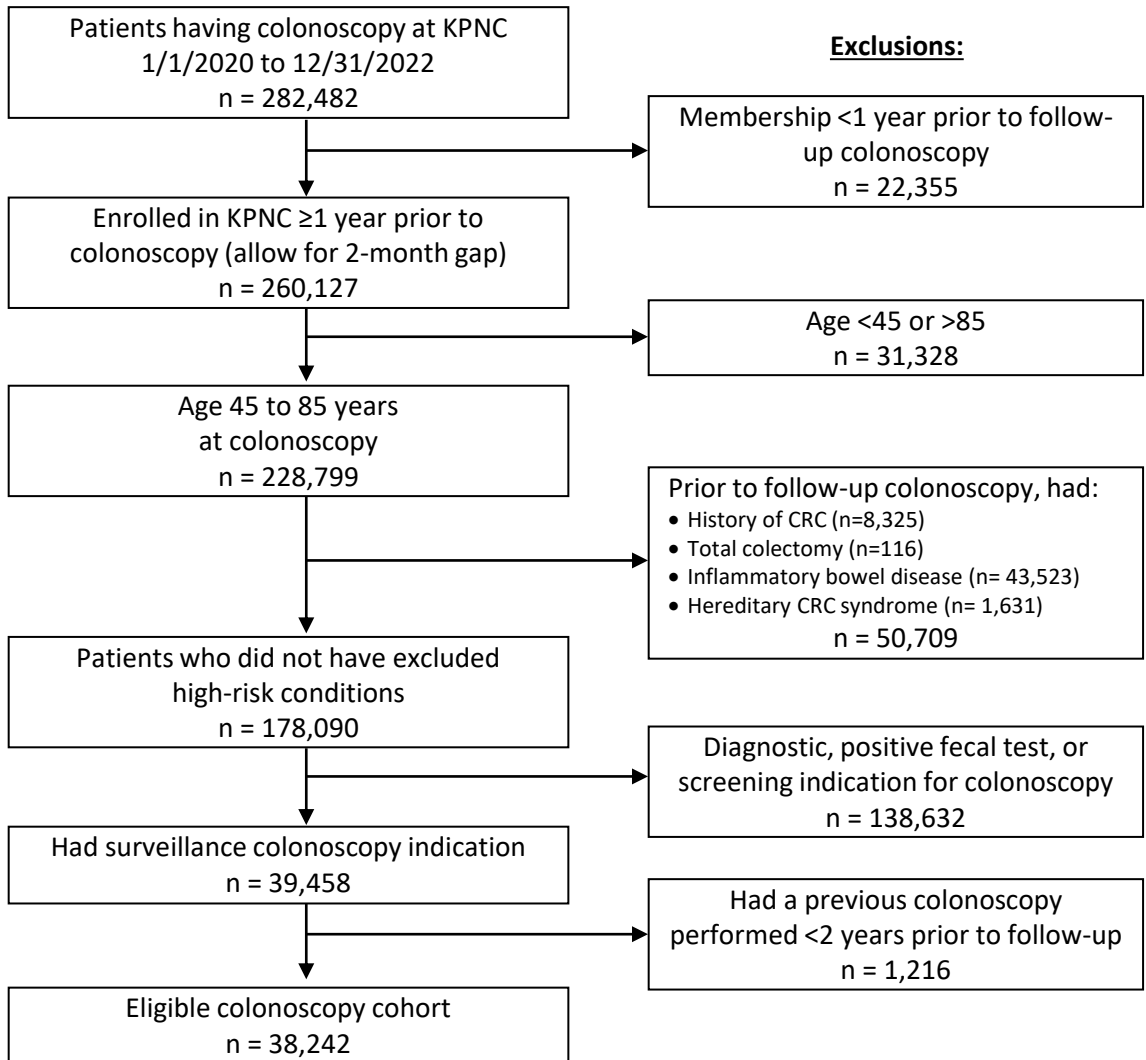

Supplement: mmc2.pdf [file mmc2.pdf]
